# Supplementary material for: Food-Safe Process for High Recovery of Flavonoids from Cocoa Beans: Antioxidant and HPLC-DAD-ESI-MS/MS Analysis
Source: PubMed Central journal article supplement (PMC7278696; doi:10.3390/antiox9050364), 2020-04-27
Supplement: antioxidants-09-00364-s001.pdf [file antioxidants-09-00364-s001.pdf]

## **Electronic Supplementary Material to:**

**Food-safe process for high recovery of flavonoids from cocoa beans: antioxidant and  
HPLC- DAD-ESI-MS/MS analysis**

Said Toro-Uribe <sup>1</sup>, Elena Ibañez <sup>2</sup>, Eric A. Decker <sup>3</sup>, Arley René Villamizar-Jaimes <sup>4</sup>, Luis  
Javier López-Giraldo <sup>1,\*</sup>

**Table S1.** ANOVA for TP, TF, and TF3 through 24 surface design + central points+ start points.

|                       | Total Polyphenols (mgGAE/g) |    |         |        |         | Total Flavonoids (mgECE/g) |    |          |         |         | Total Flavan-3-ols (mgECE/g) |    |         |         |         |
|-----------------------|-----------------------------|----|---------|--------|---------|----------------------------|----|----------|---------|---------|------------------------------|----|---------|---------|---------|
|                       | SS                          | df | MS      | F      | p       | SS                         | df | MS       | F       | p       | SS                           | df | MS      | F       | p       |
| <b>T</b>              | 121.89                      | 1  | 121.892 | 25.054 | 0.00002 | 145.61                     | 1  | 145.612  | 25.0688 | 0.00002 | 331.817                      | 1  | 331.817 | 67.2240 | 0.00000 |
| <b>T<sup>2</sup></b>  | 24.53                       | 1  | 24.534  | 5.043  | 0.03251 | 724.60                     | 1  | 724.600  | 124.748 | 0.00000 | 6.457                        | 1  | 6.457   | 1.3082  | 0.26207 |
| <b>SS</b>             | 279.34                      | 1  | 279.342 | 57.416 | 0.00000 | 2281.04                    | 1  | 2281.037 | 392.706 | 0.00000 | 4.410                        | 1  | 4.410   | 0.8934  | 0.35235 |
| <b>SS<sup>2</sup></b> | 283.53                      | 1  | 283.529 | 58.277 | 0.00000 | 113.79                     | 1  | 113.786  | 19.5896 | 0.00012 | 56.859                       | 1  | 56.859  | 11.5193 | 0.00201 |
| <b>EW</b>             | 765.38                      | 1  | 765.383 | 157.31 | 0.00000 | 106.59                     | 1  | 106.594  | 18.3514 | 0.00018 | 209.481                      | 1  | 209.481 | 42.4395 | 0.00000 |
| <b>EW<sup>2</sup></b> | 5940.53                     | 1  | 5940.52 | 1221.0 | 0.00000 | 5591.41                    | 1  | 5591.412 | 962.625 | 0.00000 | 1710.30                      | 1  | 1710.30 | 346.495 | 0.00000 |
| <b>pH</b>             | 382.70                      | 1  | 382.701 | 78.661 | 0.00000 | 134.49                     | 1  | 134.493  | 23.1546 | 0.00004 | 595.725                      | 1  | 595.725 | 120.690 | 0.00000 |
| <b>pH<sup>2</sup></b> | 227.97                      | 1  | 227.967 | 46.857 | 0.00000 | 5.92                       | 1  | 5.920    | 1.0193  | 0.32104 | 5.672                        | 1  | 5.672   | 1.1492  | 0.29256 |
| <b>T×SS</b>           | 3.89                        | 1  | 3.894   | 0.800  | 0.37832 | 43.38                      | 1  | 43.376   | 7.4676  | 0.01058 | 98.727                       | 1  | 98.727  | 20.0015 | 0.00011 |
| <b>T×EW</b>           | 28.04                       | 1  | 28.045  | 5.764  | 0.02299 | 9.23                       | 1  | 9.226    | 1.5883  | 0.21761 | 282.789                      | 1  | 282.789 | 57.2912 | 0.00000 |
| <b>T×pH</b>           | 0.03                        | 1  | 0.026   | 0.005  | 0.94216 | 1.21                       | 1  | 1.210    | 0.2084  | 0.65143 | 6.530                        | 1  | 6.530   | 1.3229  | 0.25946 |
| <b>SS×EW</b>          | 4.75                        | 1  | 4.751   | 0.977  | 0.33121 | 511.66                     | 1  | 511.657  | 88.0875 | 0.00000 | 46.878                       | 1  | 46.878  | 9.4972  | 0.00448 |
| <b>SS×pH</b>          | 3.76                        | 1  | 3.764   | 0.774  | 0.38632 | 1.59                       | 1  | 1.587    | 0.2733  | 0.60510 | 26.738                       | 1  | 26.738  | 5.4170  | 0.02712 |
| <b>EW×pH</b>          | 169.72                      | 1  | 169.718 | 34.884 | 0.00000 | 3.97                       | 1  | 3.972    | 0.6839  | 0.41500 | 130.251                      | 1  | 130.251 | 26.3881 |         |
| <b>Error</b>          | 475.99                      | 39 | 12.205  |        |         | 585.86                     | 39 | 15.022   |         |         | 436.821                      | 39 | 11.201  |         |         |
| <b>Total SS</b>       | 10988.6                     | 53 |         |        |         | 12768.3                    | 53 |          |         |         | 4622.14                      | 53 |         |         |         |

where SS is the sum of square, df the degree of freedom, MS the mean square, p is the value of confidence interval, T (temperature), SS (solute/solvent ratio), and EA (ethanol/water ratio). TP is total polyphenol, TF is total flavonoid, and TF3 is total flavan-3ol

### Supplementary Equations

Predicted mathematical for TP, TF, and TF3 on cocoa beans, as follows:

**Equation S1.** Predicted model for total polyphenols content

$$Y_{TPC} = 104.36 + 0.01T - 2063.89 SS + 36443.83 SS^2 + 2.62 EW - 0.02EW^2 \\ - 19.01pH + 2.72 pH^2 - 0.09EW * pH$$

**Equation S2.** Predicted model for total flavonoids content

$$Y_{TF} = 99.20 - 3.71T + 0.04 T^2 + 23087.14 SS^2 + 1.33 EW - 0.02EW^2 \\ + 19.19 SS * pH$$

**Equation S3.** Predicted model for a total flavan-3-ol content

$$Y_{TF3} = 16320.24 SS^2 - 0.01 EW^2 - 21.08 T * SS + 0.01 T * EW + 5.81 SS * pH \\ + 0.08 EW * pH$$
